# Supplementary material for: Catalytic activity of nanostructured Au: Scale effects versus bimetallic/bifunctional effects in low-temperature CO oxidation on nanoporous Au
Source: publisher site journal article supplement (doi:10.3762/bjnano.4.13), 2013-02-19
Supplement: Additional file 1 [file 2190-4286-4-13-S1.pdf]

## **Supporting Information**

for

### **Catalytic activity of nanostructured Au: Scale effects vs bimetallic/bifunctional effects in low temperature CO oxidation on nanoporous Au**

Lu-Cun Wang<sup>1</sup>, Yi Zhong<sup>2</sup>, Haijun Jin<sup>3</sup>, Daniel Widmann<sup>1</sup>, Jörg Weissmüller<sup>2,4</sup>

and R. Jürgen Behm<sup>1\*</sup>

Address: <sup>1</sup>Institute of Surface Chemistry and Catalysis, Ulm University, D-89069 Ulm, Germany,

<sup>2</sup>Institut für Werkstofforschung Helmholtz-Zentrum Geesthacht, D-21502 Geesthacht, Germany,

<sup>3</sup>Institute of Metal Research, Chinese Academy of Sciences, 110016, Shenyang, P.R.China and

<sup>4</sup>Institut für Werkstoffphysik und Werkstofftechnologie, TU Hamburg-Harburg, D-21073

Hamburg, Germany

Email: Jürgen Behm\* - juergen.behm@uni-ulm.de

\*Corresponding author

**Additional XPS and TPD spectra**

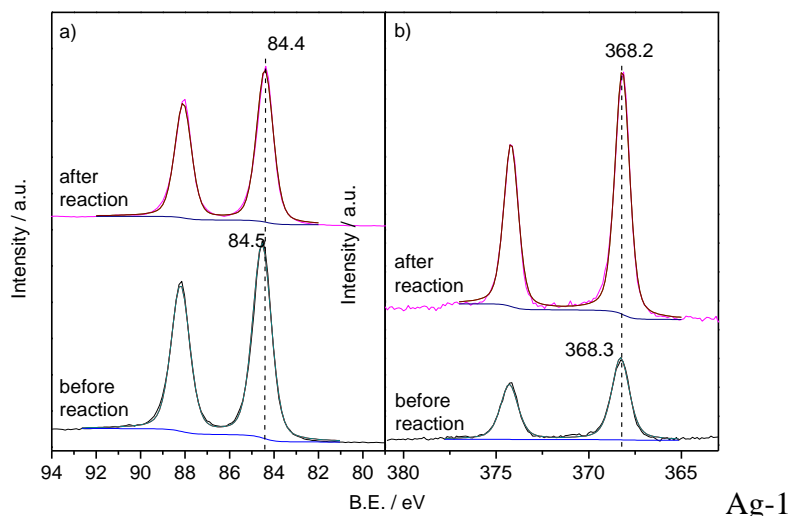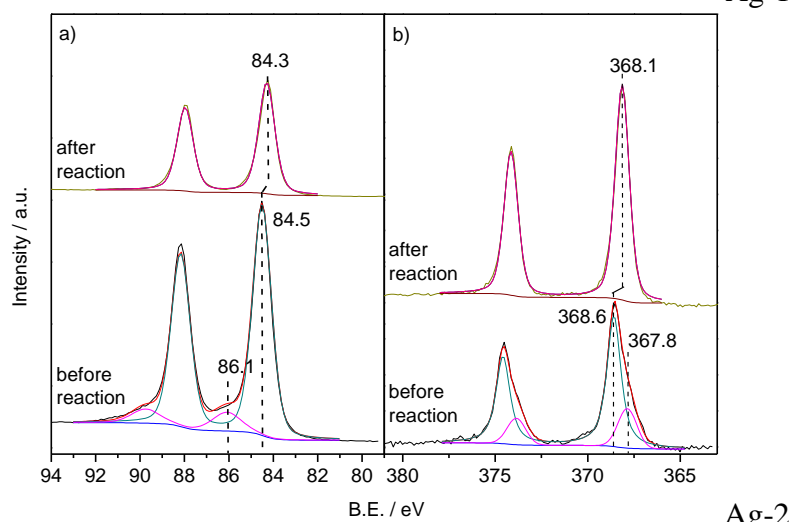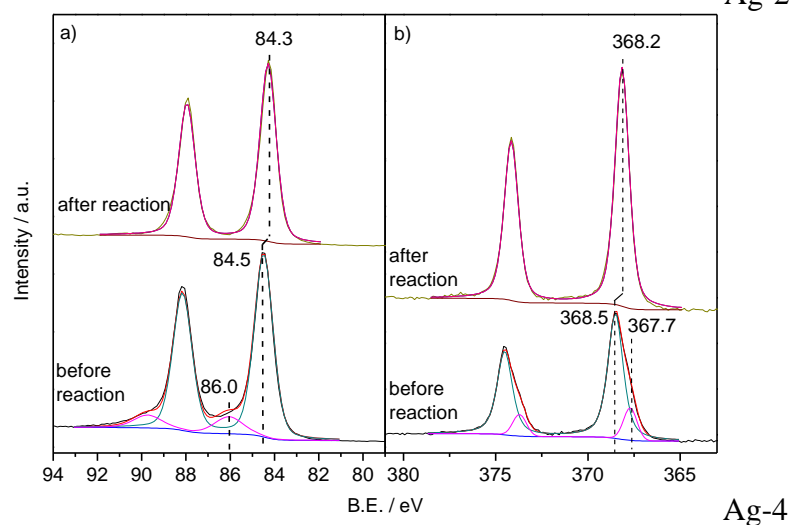

**Figure S1:** Au(4f) (a) and Ag (3d) (b) XP spectra recorded on various NPG(Ag) catalysts before and after reaction (1000 min on stream).

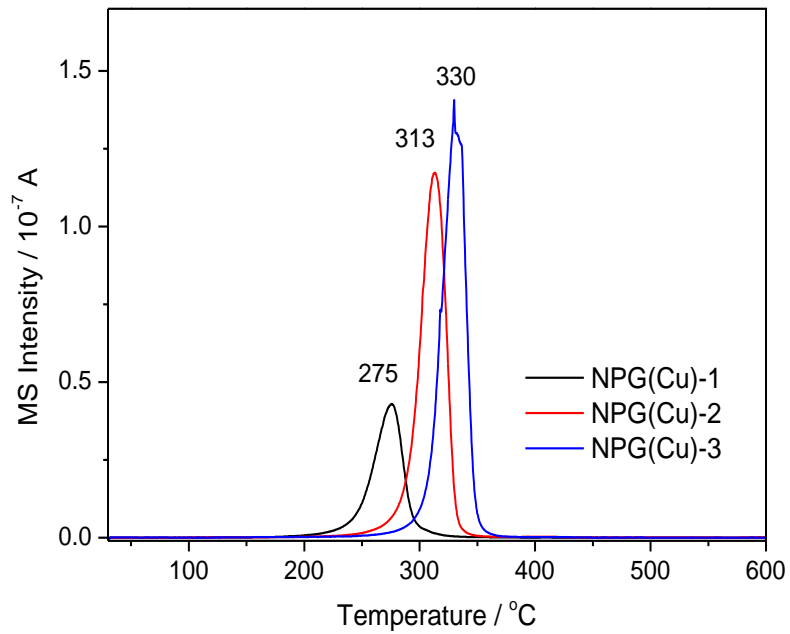

**Figure S2:** O<sub>2</sub> TPD spectra recorded on various fresh NPG(Cu) catalysts.
